# Supplementary material
Source: publisher site journal article supplement (https://static.cambridge.org/content/id/urn:cambridge.org:id:article:S0014479719000127/resource/name/S0014479719000127supp001.docx)
Supplement: Supplementary file 1 [file S0014479719000127supp001.docx]

APPENDIX II

1. Almekinders CJM, Elings A. 2001. Collaboration of farmers and breeders: Participatory crop improvement. Euphytica 122: 425-438
2. Ashby JA. 2007. Fostering farmer first methodological innovation: organizational learning and change in International agricultural research. On: http://www.future-agricultures.org/farmerfirst/files/D1_Ashby.pdf. Accessed 11 May 2018.
3. Ashby JA, Sperling L. 1995. Institutionalizing Participatory, Client-Driven Research and Technology Development in Agriculture. Development and Change 26: 753-770
4. Ashby JA, Lilja N. 2004. Participatory Research: Does it Work? Evidence from Participatory Plant Breeding. In: New directions for a diverse planet. Proceedings of the 4th International Crop Science Congress, 26 Sep – 1 Oct 2004, Brisbane, Australia
5. Ashby J, Polar V, Thiele G. 2018. Critical Decisions for Ensuring Plant or Animal Breeding is Gender-Responsive. GBI Brief 1. Lima (Peru). CGIAR Gender and Breeding
6. Atlin GN, Cooper M, Bjørnstad Å. 2001. A comparison of formal and participatory breeding approaches using selection theory. Euphytica 122: 463–475
7. Badstue A, Lone B, Hellin J, Berthaud J. 2012. Re-orienting participatory plant breeding for wider impact. African Journal of Agricultural Research 7(4): 523-533
8. Bänziger M, Cooper M. 2001. Breeding for low input conditions and consequences for participatory plant breeding: Examples from tropical maize and wheat. Euphytica 122: 503–519
9. Belay G. 2009. Does client-oriented plant breeding work? CAB Reviews: Perspectives in Agriculture, Veterinary Science, Nutrition and Natural Resources: 1-7
10. Bellon M, Reeves, J (eds). 2002. Quantitative Analysis of Data from Participatory Methods in Plant Breeding. Mexico: CIMMYT. Mexico, DF: CIMMYT pp 153
11. Bellon MR. 2006. Crop research to benefit poor farmers in marginal areas of the developing world: a review of technical challenges and tools. CAB Reviews: Perspectives in Agriculture, Veterinary Science, Nutrition and Natural Resources, 1, No 070
12. Bellon MR, Hodson D, Bergvinson D, Beck D, Martinez-Romero E, Montoya Y. 2003. Targeting agricultural research to benefit poor farmers: Relating poverty mapping to maize environments in Mexico. Food Policy 30: 265-275
13. Biggs S, Gauchan D. 2001. The broader institutional context of participatory plant breeding in the changing agricultural and natural resources R and D system in Nepal. In “An Exchange of Experiences from South and Southeast Asia” Proceedings of the International Symposium on Participatory Plant Breeding and Participatory Plant Genetic Resource Enhancement, Pokhara, Nepal, 1–5 May 2000, 61–74. Cali, Columbia: Participatory Research and Gender Analysis Program, Coordination Office, International Center for Tropical Agriculture
14. Bishaw Z, Turner M. 2008. Linking participatory plant breeding to the seed supply system. Euphytica 163: 31–44
15. Bonneuil C, Demeulenaere E. 2007. Une génétique de pair à pair ? L’émergence de la sélection participative. F. Charvolin, Micoud, A., et Nyhart, L.K. dir. Les sciences citoyennes. Vigilance collective et rapport entre profane et scientifique dans les sciences naturalistes. Ed de L’Aube 122-147
16. Ceccarelli S. 2000. Decentralized Participatory Plant Breeding: Adapting Crops to Environments and Clients. Proceedings of the 8th International Barley Genetics Symposium, Adelaide, 22 27 October, 2000, Vol. I: 159-166
17. Ceccarelli S, Grando S. 2002. Plant breeding with farmers requires testing the assumptions of conventional plant breeding: Lessons from the ICARDA barley program. In: Cleveland DA and Soleri D, (eds.). Farmers, scientists and plant breeding: Integrating Knowledge and Practice. Wallingford, Oxon, UK: CAB I Publishing International. pp. 297-332
18. Ceccarelli S, Grando S, Baum M, Udupa SM. 2004. Breeding for Drought Resistance in a Changing Climate. pp 167-190. In S.C. Rao and J. Ryan (ed.) 2004. Challenges and Strategies for Dryland Agriculture. CSSA Spec. Publ. 32. ASA and CSSA, Madison, W.
19. Ceccarelli S, Grando S. 2005. Decentralized-Participatory Plant Breeding pg 145-156 In: Tuberosa R, Phillips RL, Gale M. (eds.), Proceedings of the International Congress “In the Wake of the Double Helix: From the Green Revolution to the Gene Revolution”, 27-31 May 2003, Bologna, Italy, ©2005 Avenue media, Bologna
20. Ceccarelli S, Grando S, Baum M. 2007. Participatory Plant Breeding in Water-Limited Environments. Experimental Agriculture 43: 411-435
21. Ceccarelli S, Grando S. 2007. Decentralized-Participatory Plant Breeding: An Example of Demand Driven Research. Euphytica 155: 349-360
22. Ceccarelli S. 2012. Plant breeding with farmers – a technical manual. ICARDA, PO Box 5466, Aleppo, Syria. pp xi + 126
23. Ceccarelli S, Galié A, Mustafa Y, Grando S. 2013. Syria: Participatory barley breeding—farmers’ input becomes everyone’s gain. In: Ruiz, Manuel and Ronnie Vernooy (eds). The Custodians of biodiversity: sharing access and benefits to genetic resources. Earthscan 2 Park Square, Milton Park, Abingdon, Oxon OX14 4RN. pp. 53-66
24. Ceccarelli S, Galié A, Grando S. 2013. Participatory Breeding for Climate Change-Related Traits. In C. Kole (ed.), Genomics and Breeding for Climate-Resilient Crops, Vol. 1, Springer-Verlag Berlin Heidelberg, pp 331-376
25. Ceccarelli S, Grando S, Winge T. 2013. Participatory Barley Breeding in Syria. In: Regine Andersen and Tone Winge (eds.) Realising Farmers' Rights to Crop Genetic Resources: Success Stories and Best Practices (Abingdon, UK: Routledge) pp 97-116
26. Ceccarelli S. 2015. Efficiency of plant breeding. Crop Science 55: 87-97
27. Chable V, Serpolay E. 2016. Recherche multi-acteurs et transdisciplinaire pour des systèmes alimentaires bio et locaux. Techniques de l’ingenieur ag103
28. CGIAR Gender and Breeding Initiative 2018. Innovation in Gender-Responsive Breeding: Workshop Report. Nairobi, Kenya. October 5-7, 2017. Lima, Peru, pp 1-79
29. Cleveland DA, Soleri D. 2006. Farmer knowledge and scientist knowledge in sustainable agricultural development: Ontology, epistemology and praxis In Sillitoe (Ed) Local Science vs Global Science: Approaches to Indigenous Knowledge in International Development pp 209-229
30. Cleveland DA, Soleri D. 2007. Extending Darwin’s Analogy: Bridging Differences in Concepts of Selection between Farmers, Biologists, and Plant Breeder. Economic Botany 61(2): 121–136
31. Christinck A, Weltzien E, Rattunde F, Ashby J. 2017. Gender Differentiation of Farmer Preferences for Varietal Traits in Crop Improvement: Evidence and Issues. Working Paper No. 2. CGIAR Gender and Agriculture Research Network; CGIAR System Management. Office and International Center for Tropical Agriculture (CIAT). Cali, Colombia. 38 p.
32. Dawson JC, Murphy KM, Jones SS. 2008. Decentralized selection and participatory approaches in plant breeding for low-input systems. Euphytica 160:143–154
33. Dawson JC, Goldberger JR. 2008. Assessing farmer interest in participatory plant breeding: Who wants to work with scientists? Renewable Agriculture and Food Systems 23 (03): 177-187
34. Dawson J. 2016. Building Resilient Seed Systems: Implications for Germplasm Conservation, Plant Breeding and the Organic Seed Community. In: Davis, K. 2016. Organic Seed Growers Conference Proceedings. February 4 - 6, 2016, Corvallis, OR. Organic Seed Alliance, Port Townsend, WA. pp. 136-138
35. Delate K, Canali S, Turnbull R, Tan R, Colombo L. 2016. Participatory organic research in the USA and Italy: Across a continuum of farmer-researcher partnerships. Renewable Agriculture and Food Systems 32 (4): 331-348
36. Desclaux D, Nolot JM, Chiffoleau Y, Gozé E, Leclerc C. 2008. Changes in the concept of genotype x environment interactions to fit agriculture diversification and decentralized participatory plant breeding: pluridisciplinary point of view. Euphytica 163:533–546
37. Desclaux D, Ceccarelli S, Navazio J, Coley M, Trouche G, Aguirre S, Weltzien E, Lançon J. 2012. Centralized or Decentralized Breeding: The Potentials of Participatory Approaches for Low-Input and Organic Agriculture. Chapter 6 In Lammerts van Bueren ET, Myers JR (eds), Organic Crop Breeding. Wiley-Blackwell Publishing, Hoboken, NJ pp 99-123
38. Faris A. 2015. Peasant agriculture, seeds, and biodiversity. Canadian Food Studies / La Revue canadienne des études sur l'alimentation, [S.l.], v. 2, n. 2, p. 313-320
39. Fekadu F, Baum M, Grando S, Kafawin, O, Ceccarelli S. 2007. Consequences of a Decentralized-Participatory Barley Breeding Program on Changes in SSR Allele Frequency and Diversity in one Cycle of Selection. Plant Breeding 126: 527-532
40. Forster D, Adamtey N, Messmer MM, Pfiffner L, Baker B, Huber B, Niggli U. 2012. Organic Agriculture—Driving Innovations in Crop Research. Agricultural Sustainability - Progress and Prospects in Crop Research. Bhullar, G., Bhullar, N. (eds.). pp 21-46.
41. Galié A, Hack B, Manning-Thomas N, Pape-Christiansen A, Grando S, Ceccarelli S. 2009. Evaluating knowledge sharing in research: the International Farmers’ Conference organized at ICARDA. Knowledge Management for Development Journal 5 (2): 108–126
42. Goldringer I, Enjalbert J, Rivière P, Dawson JC. 2012. Recherche participative pour des variétés adaptées à une agriculture à faible niveau d’intrants et moins sensibles aux variations climatiques. POUR 213. Eau et agriculture: quels défis aujourd’hui et demain? la revue du groupe de recherche pour l’éducation et la prospective.
43. Gunasekare MTK. 20°6. Adapting Crop Varieties to Environments and Clients through Decentralized - Participatory Approach. The Journal of Agricultural Sciences 2 (1): 34- 45
44. Halewood M, Deupmann P, Sthapit B, Vernooy R, Ceccarelli S. 2007. Participatory plant breeding to promote Farmers' Rights. Bioversity International, Rome, Italy. 7 pp
45. Hellin J, Bellon MR, Badstue L, Dixon J, La Rovere R. 2007. Increasing the Impacts of Participatory Research. Experimental Agriculture 44 (1): 81-95
46. Li J, Lammerts van Bueren ET, Leeuwis C, Jiggins J. 2014. Expressing the public value of plant genetic resources by organizing novel relationships: The contribution of selected participatory plant breeding and market-based arrangements. Journal of Rural Studies 36: 182- 196
47. Mangione D, Senni S, Puccioni M, Grando S, Ceccarelli S. 2006. The Cost of Participatory Barley Breeding. Euphytica 150: 289-306
48. Maxted N, Guarino L, Myer L, Chiwona EA. 2002. Towards a methodology for on-farm conservation of plant genetic resources. Genetic Resources and Crop Evolution 49 (1): 31-46
49. Mistry J, Berardi A. 2016. Bridging indigenous and scientific knowledge. Science 352 (6291): 1274-1275
50. Montenegro de Wit M. 2017. Beating the bounds: how does ‘open source’ become a seed commons? The Journal of Peasant Studies Published online: 25 Oct 2017
51. Morris ML, Bellon MR. 2004. Participatory plant breeding research: Opportunities and challenges for the international crop improvement system. Euphytica 136: 21-35
52. Murphy K, Lammer D, Lyon S, Carter B, Jones SS. 2005. Breeding for organic and low-input farming systems: An evolutionary–participatory breeding method for inbred cereal grains. Renewable Agriculture and Food Systems 20: 48–55
53. Mustafa Y, Ceccarelli S, Grando S. 2006. Benefit-cost analysis of participatory breeding program in Syria. Beirut, Lebanon: ICARDA
54. Navazio JP, Colley MR, Huber N, Campbell B, Tracy WF. 2012. Hybrids versus Open-pollinated Varieties: How Do They Fit into an Evolutionary Seed. System? In: Hubbard, K., M. Colley, and J. Zystro (eds.). Organic Seed Growers Conference Proceedings. January 19-21, 2012, Port Townsend, WA. Organic Seed Alliance, Port Townsend, WA. pp. 52-58
55. Orr A, Cox CM, Ru Y, Ashby J. 2018. Gender and social targeting in plant breeding. CGIAR Gender and Breeding Initiative Working Paper 1. Lima (Peru): CGIAR Gender and Breeding Initiative pp 1-59
56. Ortolani L, Cucco I, Fonte M. 2015. Transition pathways in participatory plant breeding programs: a farm-level network analysis. Proceedingsof the International Conference on Agriculture in an Urbanizing Society, 14-17 September 2015, Rome Italy
57. Ortolani L, Bocci R, Bàrberi P, Howlett S, Chable V, 2017. Changes in Knowledge Management Strategies Can Support Emerging Innovative Actors in Organic Agriculture: The Case of Participatory Plant Breeding in Europe. Organic Farming 3 (1): 20–33
58. Phillips SL, Wolfe MS. 2005. Evolutionary plant breeding for low input systems. Journal of Agricultural Science 143: 245-254
59. Podoll T. 2012. Rebuilding Diversity and Resilience in a Concentrated Seed Sector. In: Hubbard, K., M. Colley, and J. Zystro (eds.). 2012. Organic Seed Growers Conference Proceedings. January 19-21, 2012, Port Townsend, WA. Organic Seed Alliance, Port Townsend, WA. pp. 133-139
60. Ragot, M., Bonierbale, M. and Weltzien, E. 2018. From Market Demand to Breeding Decisions: A Framework. Lima (Peru). CGIAR Gender and Breeding Initiative. GBI Working Paper. No. 2
61. Rhoades RE and Booth, RH. 1982. Farmer-back-to-farmer: a model for generating acceptable agricultural technology. Agricultural Administration 11: 127-137
62. Rhoades RE, Horton, DE, and Booth, RH. 1986. Anthropologist, Biological Scientists and Economist: The three Musketeers of Three Stooges of Farming Systems Research? In Social Sciences and Farming System Research. Methodological Perspectives on Agricultural Development (Jones JR and Wallace BJ, Eds) Boulder: Westview Press: pp 21-40
63. Rhoades RE and Booth, RH.1992. Farmer-back-to-farmer model: ten years later. Manuscript.
64. Rosegrant MW, Cline SA. 2003. Global Food Security: challenges and policies. Science, 302: 1917- 1919
65. Salazar R, Louwaars NP, Visser B. 2007. Protecting Farmers’ New Varieties: New Approaches to Rights on Collective Innovations in Plant Genetic Resources. World Development 35 (9): 1515 – 1528
66. Scoones I, Thompson J, Chambers R. 2008. Farmer First Revisited: Innovation for Agricultural Research, Workshop Summary: Future Agricultures Consortium. https://www.researchgate.net/publication/265099608_Farmer_First_Revisited (retrieved 11 May 2018)
67. Scoones I, Thompson J, Chambers R. 2008. Farmer First Revisited: Some Reflections on the Future of the CGIAR, An Informal Note to the CGIAR Independent Review Team’ available at http://www.cgiar.org/changemanagement/pdf/farmer_first_revisited.pdf (retrieved 11 May 2018)
68. Selman L, Wyatt L, Meints B, Hodge T, Greene K, Dawson JC. 2018. Building Relationships from Seed to Fork. In: In: Hubbard, K. Organic Seed Growers Conference Proceedings. February 14-17 2018, Corvallis, OR. Organic Seed Alliance, Port Townsend, WA 97-101
69. Shelton AC, Tracy WF. 2016. Participatory plant breeding and organic agriculture: A synergistic model for organic variety development in the United States. Elem Sci Anth. 4:143
70. Soleri D, Cleveland DA, Smith SE, Ceccarelli S, Grando S, Rana RB, Rijal D, Labrada HR. 2002. Understanding farmers’ knowledge as the basis for collaboration with plant breeders: methodological development and examples from ongoing research in Mexico, Syria, Cuba and Nepal. In: Cleveland DA. Soleri D, (eds.). Farmers, scientists and plant breeding: Integrating Knowledge and Practice. Wallingford, Oxon, UK: CAB I Publishing International. pp. 19-60
71. Sperling L, Ashby JA, Smith M, Weltzien E, McGuire S. 2001. A framework for analyzing participatory plant breeding approaches and results. Euphytica 122 (3): 439–450
72. van Eeuwijk FA, Cooper M, DeLacy IH, Ceccarelli S, Grando S. 2001. Some vocabulary and grammar for the analysis of multi environment trials, as applied to the analysis of FPB and PPB trials. Euphytica 122: 477-490
73. Van Etten J, Beza E, Calderer L, Van Duijvendi K, Fadda C, Fantahun B, Gebrehawaryat Kidane Y, Van De Gevel J, Gupta A, Kassahun Mengistu D, Kiambi D, Narain Mathur P, Mercado L, Mittra S, Mollel MJ, Rosas JC, Steinke J, Suchini JG, Zimmerer KS. 2016. First Experiences with a Novel Farmer Citizen Science Approach: Crowdsourcing Participatory Variety Selection Through On-Farm Triadic Comparisons of Technologies (Tricot). Experimental Agriculture https://doi.org/10.1017/S0014479716000739 Published online: 21 December 2016, pp. 1-22
74. Vom Brocke K, PresterlT, Christinck A, Weltzien E, Geiger HH. 2002. Farmers' seed management practices open up new base populations for pearl millet breeding in a semi arid zone of India. Plant Breeding 121: 36 42.
75. Walker TS. 2006. Participatory Varietal Selection, Participatory Plant Breeding, and Varietal Change. Background paper for the World Development Report 2008. World Bank, Washington, DC. © World Bank. https://openknowledge.worldbank.org/handle/10986/9182 License: CC BY 3.0 IGO.”
76. Wakjira A, Keneni G, Jarso M, Weyessa B. 2008. Opportunities for participatory crop improvement and supporting informal seed supply in Oromia region, Ethiopia. In: Thijssen, M.H., Z. Bishaw, A. Beshir and W.S. de Boef, (Eds.). Farmers, seeds and varieties: supporting informal seed supply in Ethiopia. Wageningen, Wageningen International, 185 - 191
77. Weltzien E, Christinck A. 2017. Participatory Breeding: Developing Improved and Relevant Crop Varieties with Farmers. In: Sieglinde Snapp and Barry Pound (ed) Agricultural Systems (Second Edition): 259-301, Agroecology and Rural Innovation for Development
78. Witcombe JR, Joshi A, Joshi KD, Sthapit BR. 1996. Farmer Participatory Crop Improvement. I. Varietal Selection and Breeding Methods and Their Impact on Biodiversity. Experimental Agriculture 32: 445-460
79. Witcombe JR, Virk DS. 2001. Number of crosses and population size for participatory and classical plant breeding. Euphytica 122: 451–462
80. Zystro J. 2012. Participatory Plant Breeding Practices. In: Hubbard, K., M. Colley, and J. Zystro (eds.). 2012. Organic Seed Growers Conference Proceedings. January 19-21, 2012, Port Townsend, WA. Organic Seed Alliance, Port Townsend, WA. pp. 81-82
81. Zystro J. 2016. Participatory Plant Breeding: Commercialization and Maintenance. In: Davis, K. 2016. Organic Seed Growers Conference Proceedings. February 4 - 6, 2016, Corvallis, OR. Organic Seed Alliance, Port Townsend, WA. pp. 53-55
82. Zystro J. 2016. Breeding for Resiliency in the Face of Climate Chaos. In: Davis, K. 2016. Organic Seed Growers Conference Proceedings. February 4 - 6, 2016, Corvallis, OR. Organic Seed Alliance, Port Townsend, WA. pp. 160-164
